# Supplementary material
Source: PubMed Central journal article supplement (PMC5245710)
Supplement: NIHMS842188-supplement-supp_fig_1.pdf [file NIHMS842188-supplement-supp_fig_1.pdf]

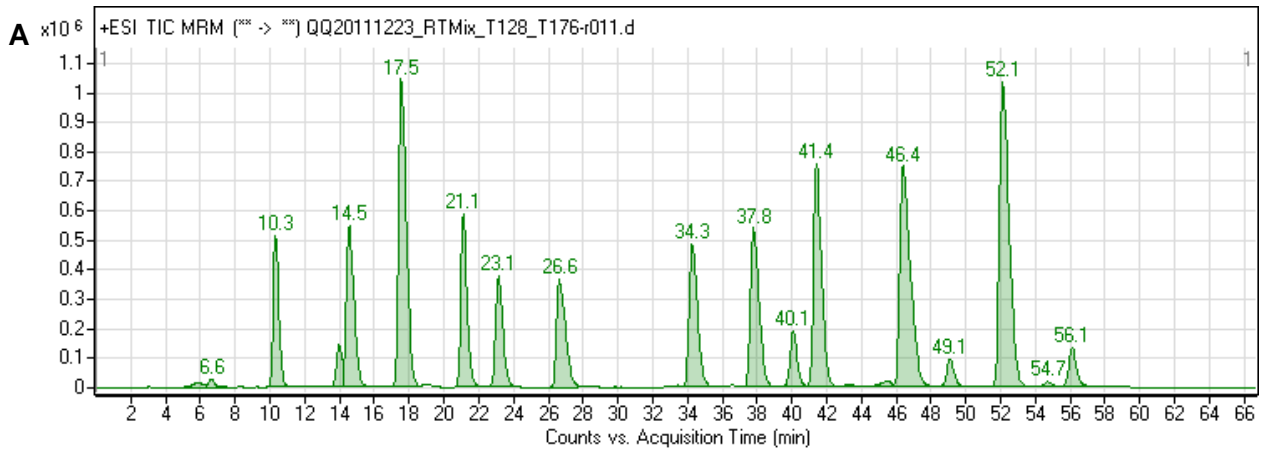

**B**

| Sequence     | RT   | SSR  | MW        |
|--------------|------|------|-----------|
| LGGGGGGDGSR  | 3.1  | 3.6  | 888.4049  |
| TSTSPPEK     | 5.9  | 4.1  | 942.4658  |
| SVSQQASQER   | 6.6  | 4.5  | 1118.5316 |
| APEETIQSK    | 10.3 | 6.6  | 1001.5029 |
| LGGGGGGDFR   | 14.0 | 12.9 | 891.4198  |
| EGNSTVDCLK   | 14.5 | 13.9 | 1121.5023 |
| VLDVNDNAPK   | 17.5 | 14.8 | 1083.5560 |
| LGDPACPEIK   | 21.1 | 18.3 | 1098.5379 |
| LLGGGGDFR    | 23.1 | 21.5 | 890.4610  |
| HWYITGVPVREK | 26.6 | 25.7 | 1485.7728 |
| LLLGGDFR     | 34.3 | 29.4 | 889.5021  |
| ADSYEYLLK    | 37.8 | 30.9 | 1263.6023 |
| VAQVLEGFITR  | 40.1 | 35.7 | 1231.6924 |
| ILAILENLK    | 41.4 | 34.5 | 1154.6910 |
| LLLLDFR      | 46.4 | 36.5 | 888.5433  |
| SVVLCLEVAR   | 49.1 | 46.5 | 1257.7115 |
| ILAPLLLDK    | 52.1 | 37.4 | 1107.7267 |
| WNVEDVYEFIR  | 52.6 | 44.2 | 1468.6987 |
| LLLLDFR      | 54.7 | 41.7 | 1001.6273 |
| DILLPLQLPR   | 56.1 | 41.7 | 1289.8071 |
| WPGFYILQWK   | 56.7 | 43.3 | 1336.6968 |
