# Supplementary material
Source: PubMed Central journal article supplement (PMC5245710)

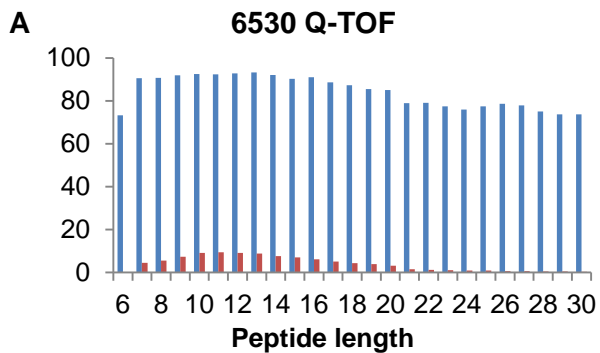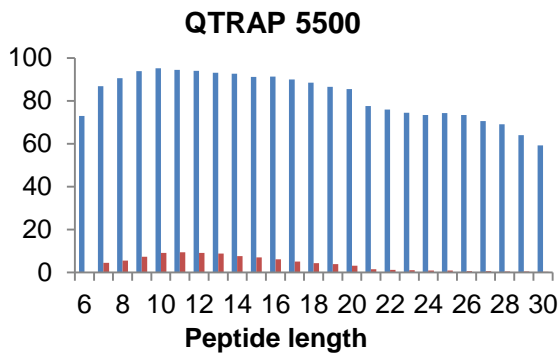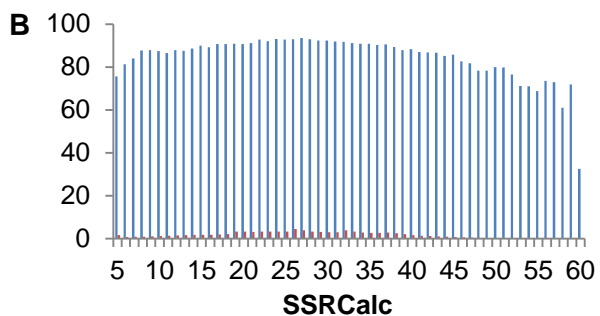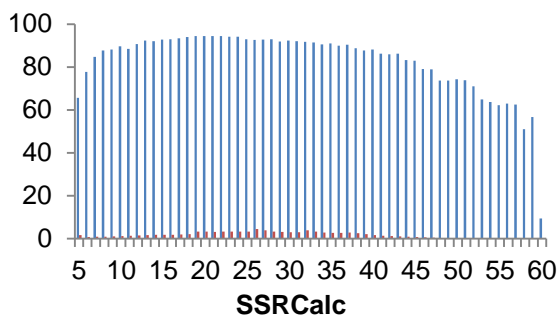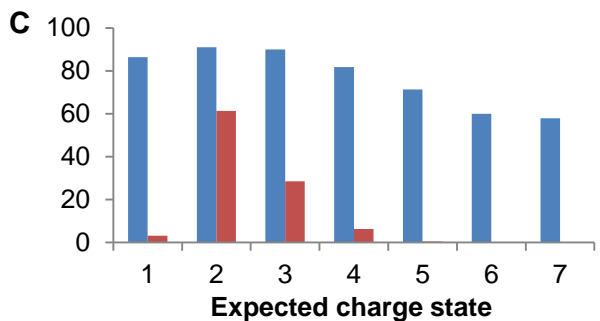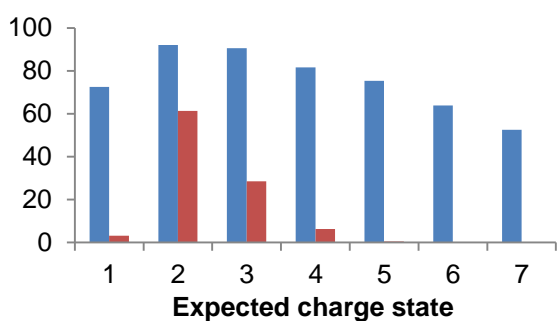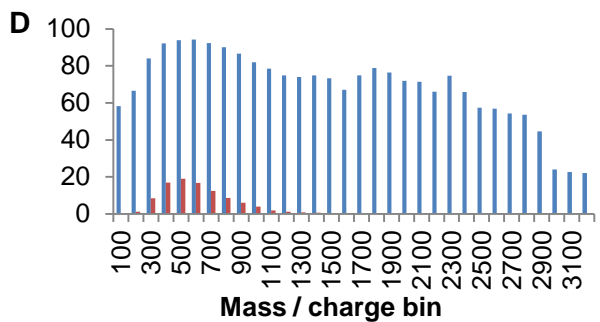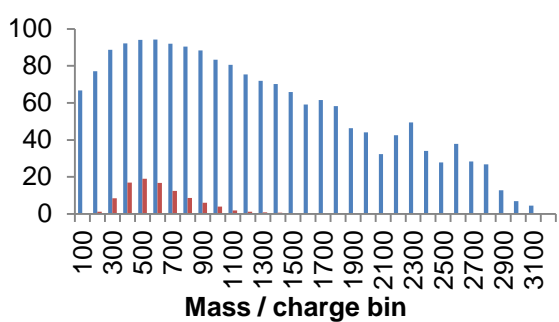

■ Success rate in %  
 ■ Selected peptides in %

Supplement: NIHMS842188-supplement-supp_fig_2.pdf [file NIHMS842188-supplement-supp_fig_2.pdf]

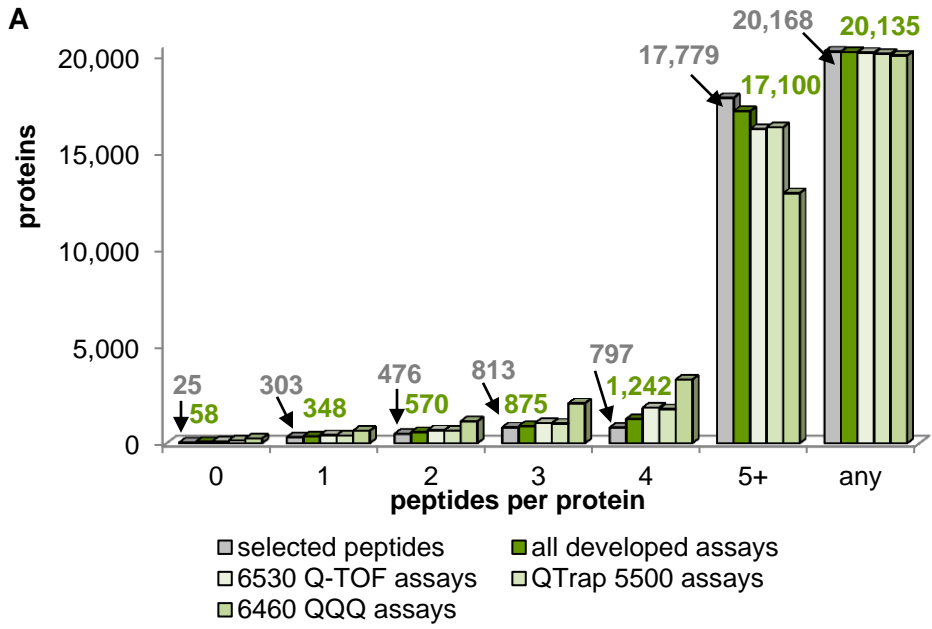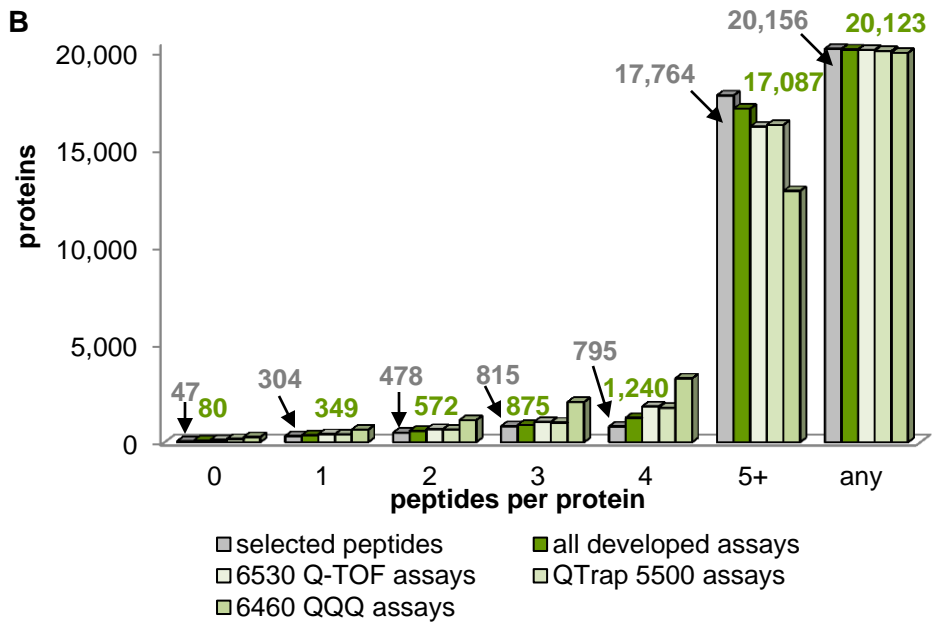

Supplement: NIHMS842188-supplement-supp_fig_3.pdf [file NIHMS842188-supplement-supp_fig_3.pdf]

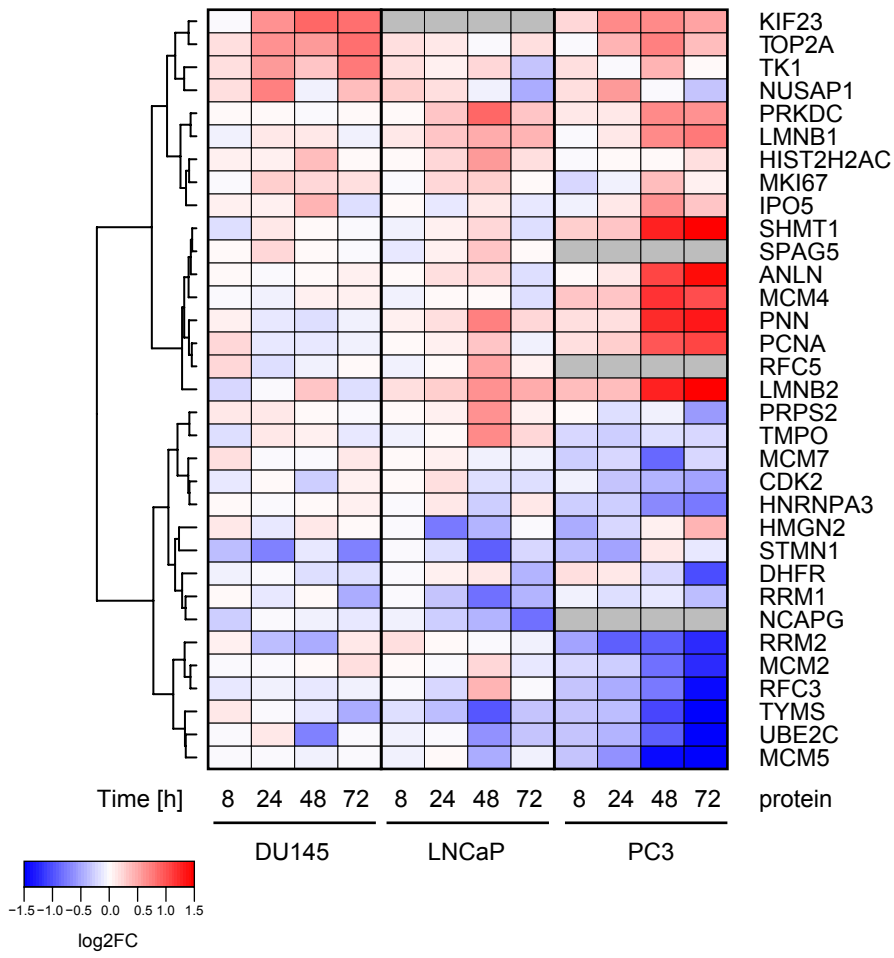

Supplement: NIHMS842188-supplement-supp_fig_4.pdf [file NIHMS842188-supplement-supp_fig_4.pdf]
